# Supplementary material for: Morphology and internal structure control of rod–coil copolymer aggregates by mixed selective solvents
Source: Royal Society of Chemistry journal article supplement (doi:10.1039/c1sm05808h), 2011-01-01
Supplement: c1sm05808h.pdf [file c1sm05808h.pdf]

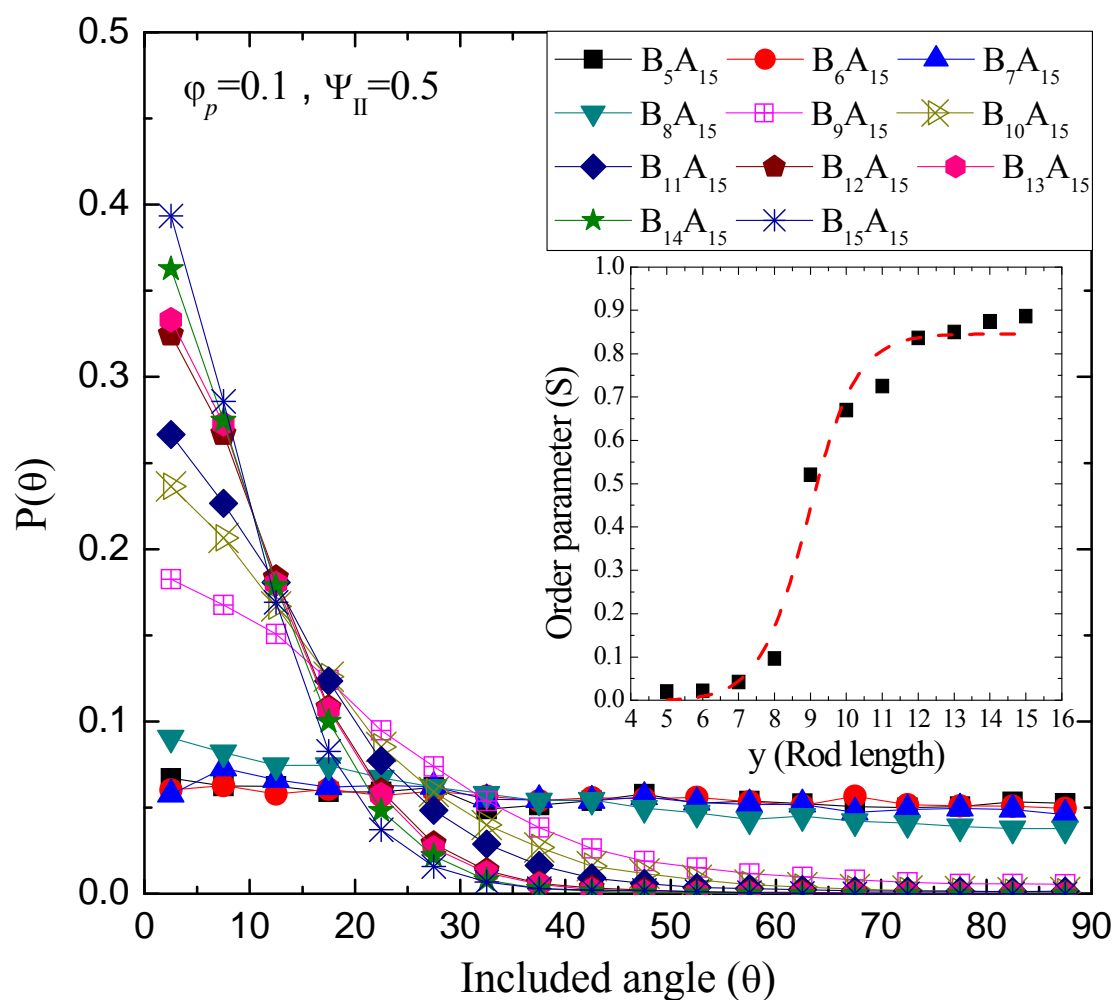

Figure S1. Included angle distribution  $P(\theta)$  of the rod domains of the aggregates formed by rod-coil diblock copolymers as a function of the rod length ( $y$ ) and solvent quality ( $\Psi_{II}$ ) at polymer composition  $\phi_p=0.1$ .

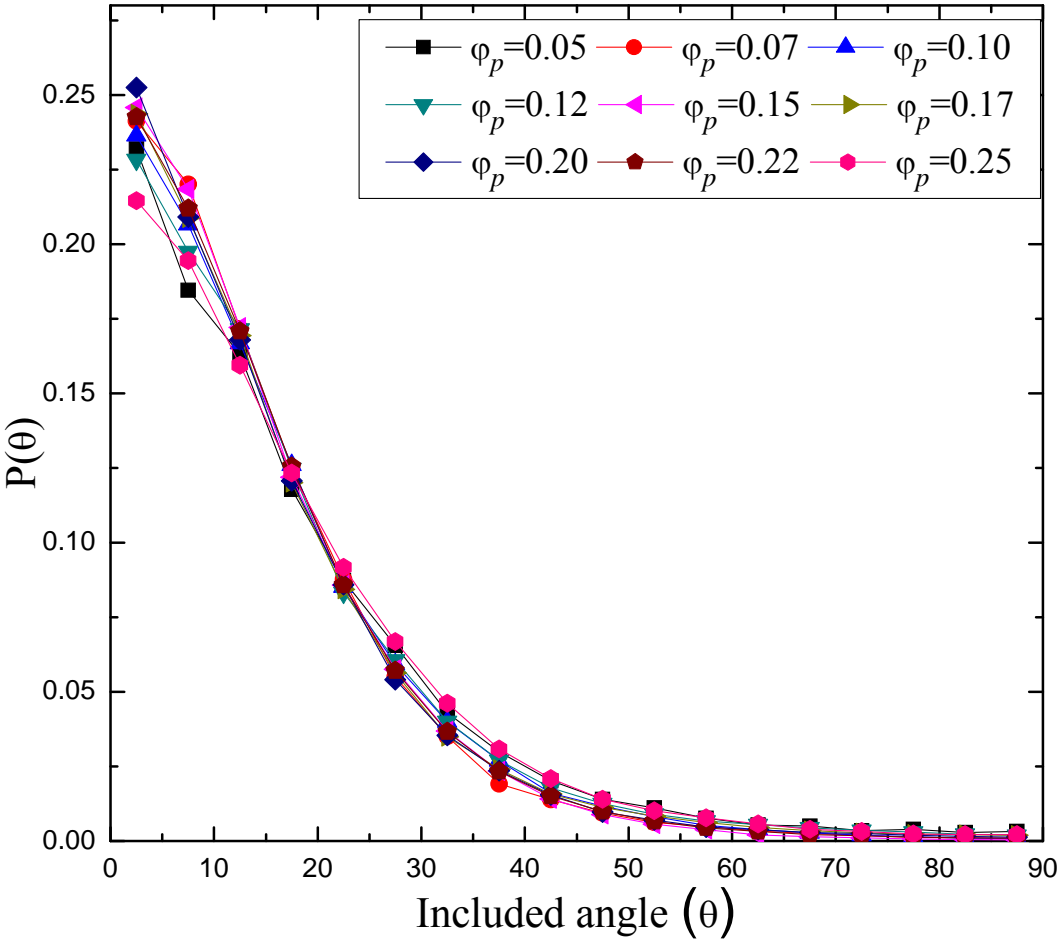

Figure S2. Included angle distribution  $P(\theta)$  of the rod domains of the aggregates formed by rod-coil diblock copolymers  $B_{10}A_{15}$  for solvent quality  $\Psi_{II}=0.5$  at different polymer concentrations.
